# Supplementary material for: BiMPADR: A Deep Learning Framework for Predicting Adverse Drug Reactions in New Drugs
Source: MDPI journal article supplement (doi:10.3390/molecules29081784), 2024-04-14
Supplement: s1 [file s1]

**Table S1.** Evidence for the top ten predicted ADRs.

| Drug name                                        | ADR name                   | Pred value | NCT Number                            |
|--------------------------------------------------|----------------------------|------------|---------------------------------------|
| <b>Birabresib<br/>(OTX015)</b>                   | Dermatitis                 | 0.9989     | NCT01713582, NCT02296476, NCT02259114 |
|                                                  | Body temperature increased | 0.9986     | NCT01713582, NCT02259114              |
|                                                  | Hypertension               | 0.9985     | NCT01713582, NCT02296476, NCT02259114 |
|                                                  | Thrombocytopenia           | 0.9982     | NCT01713582, NCT02296476, NCT02259114 |
|                                                  | Decreased appetite         | 0.9978     | NCT01713582, NCT02259114              |
|                                                  | Musculoskeletal discomfort | 0.9978     | NCT01713582, NCT02296476, NCT02259114 |
|                                                  | Anaemia                    | 0.9977     | NCT01713582, NCT02259114              |
|                                                  | Infection                  | 0.9977     | NCT01713582, NCT02296476, NCT02259114 |
|                                                  | Arthralgia                 | 0.9975     | NCT01713582, NCT02259114              |
|                                                  | Insomnia                   | 0.9974     | NCT01713582, NCT02296476, NCT02259114 |
| <b>INCB057643</b>                                | Dermatitis                 | 0.9991     | NCT02959437                           |
|                                                  | Hypersensitivity           | 0.9984     |                                       |
|                                                  | Urticaria                  | 0.9984     | NCT02959437, NCT02711137              |
|                                                  | Body temperature increased | 0.9978     | NCT02959437, NCT02711137              |
|                                                  | Asthenia                   | 0.9976     | NCT02959437, NCT02711137              |
|                                                  | Hypertension               | 0.9976     | NCT02711137                           |
|                                                  | Decreased appetite         | 0.9975     | NCT02959437, NCT02711137              |
|                                                  | Pain                       | 0.9973     | NCT02959437, NCT02711137              |
|                                                  | Fatigue                    | 0.9972     | NCT02959437, NCT02711137              |
|                                                  | Insomnia                   | 0.9970     | NCT02959437, NCT02711137              |
| <b>GSK525762A<br/>Molibresib<br/>(I-BET-762)</b> | Hypertension               | 0.9987     | NCT01943851, NCT01587703              |
|                                                  | Oedema peripheral          | 0.9983     | NCT01943851, NCT01587703              |
|                                                  | Body temperature increased | 0.9981     |                                       |
|                                                  | Alopecia                   | 0.9981     | NCT01587703                           |
|                                                  | Dermatitis                 | 0.9981     | NCT01943851, NCT01587703              |
|                                                  | Haemorrhage                | 0.9980     | NCT01943851, NCT01587703              |
|                                                  | Pneumonia                  | 0.9979     | NCT01943851, NCT01587703              |
|                                                  | Neuropathy peripheral      | 0.9979     | NCT01587703                           |
|                                                  | Cough                      | 0.9979     | NCT01943851, NCT01587703              |
|                                                  | Anxiety                    | 0.9979     | NCT01943851, NCT01587703              |
| <b>Alobresib (GS-5829)</b>                       | Dermatitis                 | 0.9975     | NCT02983604                           |
|                                                  | Fatigue                    | 0.9943     | NCT02607229, NCT02983604, NCT02392611 |
|                                                  | Hypertension               | 0.9943     | NCT02607229                           |
|                                                  | Hypersensitivity           | 0.9942     |                                       |
|                                                  | Asthenia                   | 0.9939     | NCT02607229, NCT02983604              |
|                                                  | Gastrointestinal pain      | 0.9935     | NCT02607229                           |
|                                                  | Influenza like illness     | 0.9935     | NCT02607229, NCT02983604              |
|                                                  | Abdominal pain             | 0.9934     | NCT02607229, NCT02983604, NCT02392611 |
|                                                  | Visual impairment          | 0.9931     | NCT02392611                           |
|                                                  | Cough                      | 0.9930     | NCT02607229, NCT02983604, NCT02392611 |

**Table S2.** Blood and lymphatic system disorders ADRs recorded by NIH and related literature.

| Drug name                                | ADR name                                                                   | Pred value | NCT Number                                                                                                                                                              |
|------------------------------------------|----------------------------------------------------------------------------|------------|-------------------------------------------------------------------------------------------------------------------------------------------------------------------------|
| <b>Birabresib (OTX015)</b>               | Anaemia                                                                    | 0.9977     | NCT01713582, NCT02259114                                                                                                                                                |
|                                          | Disseminated intravascular coagulation                                     | 0.8282     | NCT01713582<br>NCT02259114                                                                                                                                              |
|                                          | Leukocytosis                                                               | 0.9627     | NCT01713582                                                                                                                                                             |
|                                          | Neutropenia                                                                | 0.9962     | NCT01713582                                                                                                                                                             |
|                                          | Thrombocytopenia                                                           | 0.9981     | NCT01713582, NCT02296476, NCT02259114                                                                                                                                   |
|                                          | Febrile bone marrow aplasia, Haemorrhagic disorder                         | <0.5       | NCT01713582<br>(3/138, 1/138)*                                                                                                                                          |
| <b>INCB057643</b>                        | Anaemia                                                                    | 0.9960     | NCT02959437, NCT02711137                                                                                                                                                |
|                                          | Leukocytosis                                                               | 0.8558     | NCT02959437                                                                                                                                                             |
|                                          | Thrombocytopenia                                                           | 0.9967     | NCT02711137                                                                                                                                                             |
|                                          | Leukopenia                                                                 | 0.9935     | NCT02711137                                                                                                                                                             |
|                                          | Lymphopenia                                                                | 0.5621     | NCT02711137                                                                                                                                                             |
|                                          | Neutropenia                                                                | 0.9903     | NCT02711137                                                                                                                                                             |
|                                          | Iron deficiency anaemia, Lymph node pain, Splenic infarction, Splenomegaly | <0.5       | NCT02711137<br>(1/137, 2/137, 1/137, 1/137, 1/137)*                                                                                                                     |
| <b>TEN010</b>                            | Thrombocytopenia                                                           | 0.9988     | A dose escalation study of RO6870810/TEN-10 in patients with acute myeloid leukemia and myelodysplastic syndrome [1]                                                    |
| <b>GSK525762A Molibresib (I-BET-762)</b> | Thrombocytopenia                                                           | 0.9977     | NCT01943851, NCT01587703                                                                                                                                                |
|                                          | Febrile neutropenia                                                        | 0.0261     | NCT01943851 (12/111)*, NCT01587703                                                                                                                                      |
|                                          | Neutropenia                                                                | 0.9962     | NCT01943851, NCT01587703                                                                                                                                                |
|                                          | Leukocytosis                                                               | 0.9725     | NCT01943851, NCT01587703                                                                                                                                                |
|                                          | Anaemia                                                                    | 0.9975     | NCT01943851, NCT01587703                                                                                                                                                |
|                                          | Thrombotic microangiopathy                                                 | 0.0013     | NCT01587703(1/196)*                                                                                                                                                     |
|                                          | Histiocytosis haematophagic                                                | 0.0004     | NCT01587703(1/196)*                                                                                                                                                     |
| <b>PLX51107</b>                          | Anaemia                                                                    | 0.9923     | Phase 1 Results of Bromodomain and Extraterminal Inhibitor PLX51107 in Combination with Azacitidine in Patients with Relapsed Myeloid Malignancies [2]                  |
|                                          | Thrombocytopenia                                                           | 0.9902     |                                                                                                                                                                         |
|                                          | Neutropenia                                                                | 0.9888     |                                                                                                                                                                         |
| <b>Pelabresib (CPI-0610)</b>             | Anaemia                                                                    | 0.9983     | A Phase I Study of Pelabresib (CPI-0610), a Small-Molecule Inhibitor of BET Proteins, in Patients with Relapsed or Refractory Lymphoma [3]                              |
|                                          | Thrombocytopenia                                                           | 0.9983     |                                                                                                                                                                         |
|                                          | Lymphopenia                                                                | 0.9277     |                                                                                                                                                                         |
| <b>Mivebresib (ABBV-075)</b>             | Thrombocytopenia                                                           | 0.9971     | First-in-human Study of Mivebresib (ABBV-075), an Oral Pan-inhibitor of Bromodomain and Extra Terminal Proteins, in Patients with Relapsed/ Refractory Solid Tumors [4] |
|                                          | Anaemia                                                                    | 0.9970     |                                                                                                                                                                         |

\* This is in parentheses (Number of people with this adverse event/total number of participants in the trial), some ADRs are predicted unrelated to the drug. This could suggest the occurrence of chance events or limitations in our model when dealing with infrequent adverse reactions.

**Table S3.** Network architecture Settings for the BiMPADR model

| Module               | Layer | Type       | Description                                                            | Input Nodes | Output Nodes |
|----------------------|-------|------------|------------------------------------------------------------------------|-------------|--------------|
| Drug feature encoder | df1   | Sequential | FC <sup>1</sup> -BN <sup>2</sup> - LReLU <sup>3</sup> -DP <sup>4</sup> | 881         | 489          |
|                      | df2   | Sequential | FC-BN- LReLU- DP                                                       | 489         | 978          |
| ADR                  |       |            |                                                                        |             |              |
| feature encoder      | af    | GATConv    | GATConv                                                                | (978, 978)  | 978          |
| Drug-ADR Prediction  | p1    | Sequential | FC-BN- LReLU- DP                                                       | 1956        | 1000         |
|                      | p2    | Sequential | FC-BN- LReLU- DP                                                       | 1000        | 500          |
|                      | p3    | Sequential | FC-BN- LReLU- DP                                                       | 500         | 250          |
|                      | p4    | Sequential | FC-Sigmoid                                                             | 250         | 1            |

<sup>1</sup>FC(Fully Connected): connects neurons fully across layers for data transformation; <sup>2</sup>BN(Batch Norm): stabilizes training by normalizing layer outputs; <sup>3</sup>LReLU(Leaky ReLU): addresses inactive neurons, allowing a small gradient when the unit is not active; <sup>4</sup>DP(Drop Rate): reduces overfitting by deactivating random neurons during training.

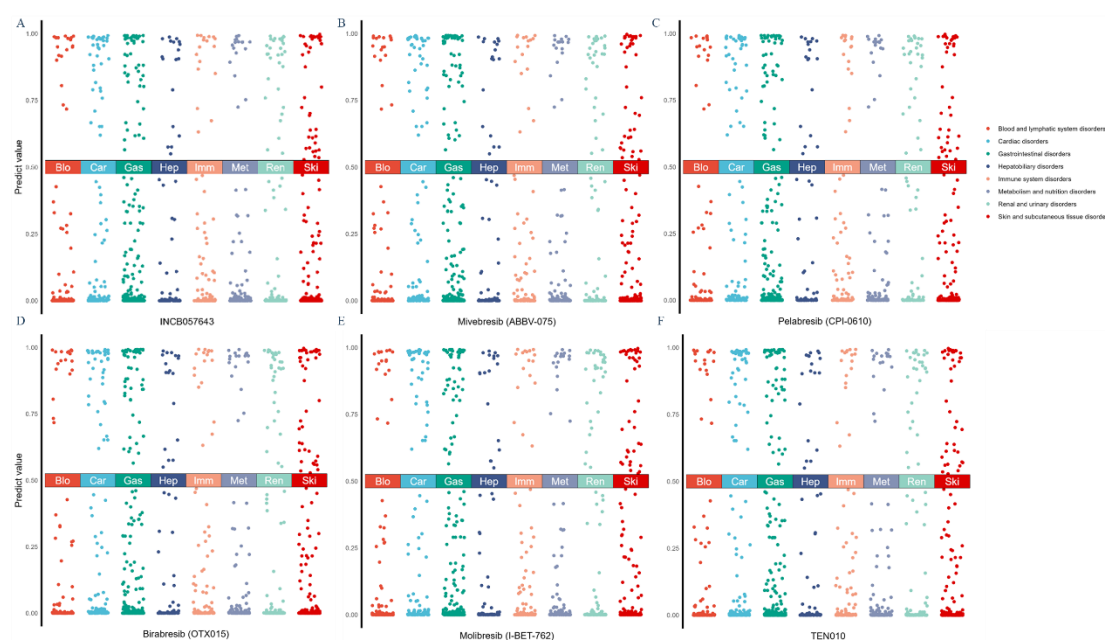

**Figure S1.** Adverse reaction predictions across different organ systems classifications: (A) predictive value for INCB057643 in different system; (B) predictive value for Mivebresib in different system; (C) predictive value for Pelabresib in different system; (D) predictive value for Birabresib in different system; (E) predictive value for Molibresib in different system; (F) predictive value for TEN010 in different system.

- Chesne, E.; Brennan, L. A dose escalation study of RO6870810/TEN-10 in patients with acute myeloid leukemia and myelodysplastic syndrome. *Leukemia & Lymphoma* **2021**, *62*, 1740-1748.
2. Senapati, J.; Fiskus, W.C.; Daver, N.; Wilson, N.R.; Ravandi, F.; Garcia-Manero, G.; Kadia, T.; DiNardo, C.D.; Jabbour, E.; Burger, J. Phase I Results of Bromodomain and Extra-Terminal Inhibitor PLX51107 in Combination with Azacitidine in Patients with Relapsed/Refractory Myeloid Malignancies. *Clinical Cancer Research* **2023**, *29*, 4352-4360.
  3. Blum, K.A.; Supko, J.G.; Maris, M.B.; Flinn, I.W.; Goy, A.; Younes, A.; Bobba, S.; Senderowicz, A.M.; Efuni, S.; Rippley, R. A phase I study of pelabresib (CPI-0610), a small-molecule inhibitor of BET proteins, in patients with relapsed or refractory lymphoma. *Cancer research communications* **2022**, *2*, 795-805.
  4. Piha-Paul, S.A.; Sachdev, J.C.; Barve, M.; LoRusso, P.; Szmulewitz, R.; Patel, S.P.; Lara Jr, P.N.; Chen, X.; Hu, B.; Freise, K.J. First-in-human study of mivebresib (ABBV-075), an oral pan-inhibitor of bromodomain and extra terminal proteins, in patients with relapsed/refractory solid tumors. *Clinical Cancer Research* **2019**, *25*, 6309-6319.
